# Supplementary material
Source: publisher figshare collection journal article supplement (https://asha.figshare.com/articles/dataset/_/17704391)
Supplement: Supplementary file 1 [file 1]

**Supplemental Material S1.** English–Spanish Vocabulary Inventory (ESVI) correlations across studies.

**Table S1.1.** ESVI and language sample correlations from Study 1.

|                           | ESVI-E TV                | ESVI-E TCV               |
|---------------------------|--------------------------|--------------------------|
| Number of Different Words | $r(49) = .405, p = .003$ | $r(49) = .472, p < .001$ |
| Number of Total Words     | $r(49) = .213, p = .13$  | $r(49) = .274, p = .05$  |
| Vocalizations             | $r(49) = .179, p = .21$  | $r(49) = .243, p = .086$ |

*Note.* TV = Total Vocabulary; TCV = Total Conceptual Vocabulary.

**Table S1.2.** ESVI and CCT correlations from Study 1.

|             | ESVI -E Spanish vocab    | ESVI-E English vocab     |
|-------------|--------------------------|--------------------------|
| CCT Spanish | $r(43) = .332, p = .026$ | $r(43) = .238, p = .117$ |
| CCT English | $r(42) = .309, p = .041$ | $r(49) = .434, p = .003$ |

*Note.* CCT = Computerized Comprehension Task.

**Table S1.3.** ESVI and LENA correlations from Study 2.

|                                 | Expressive              |                          | Receptive                |                          |
|---------------------------------|-------------------------|--------------------------|--------------------------|--------------------------|
|                                 | ESVI-ER TV              | ESVI-ER TCV              | ESVI-ER TV               | ESVI-ER TCV              |
| LENA Rate of Child Vocalization | $r(10) = .77, p = .003$ | $r(10) = .768, p = .004$ | $r(10) = .431, p = .162$ | $r(10) = .484, p = .111$ |

*Note.* LENA = Language ENvironment Analysis. TV = Total Vocabulary; TCV = Total Conceptual Vocabulary.

**Table S1.4.** PLS and CDC Milestones correlations with ESVI from Study 3.

|                                    | Expressive ESVI-E TV     | Expressive ESVI-E TCV    |
|------------------------------------|--------------------------|--------------------------|
| PLS-5 expressive subtest raw score | $r(20) = .832, p < .001$ | $r(20) = .793, p < .001$ |
| PLS-5 receptive subtest raw score  | $r(20) = .808, p < .001$ | $r(20) = .865, p < .001$ |
| CDC Milestones met                 | $r(20) = .50, p = .018$  | $r(20) = .526, p = .012$ |

*Note.* PLS = Preschool Language Scales; CDC = Centers for Disease Control; TV = Total Vocabulary; TCV = Total Conceptual Vocabulary.
