# Supplementary material
Source: publisher figshare collection journal article supplement (https://asha.figshare.com/articles/dataset/_/17704391)
Supplement: Supplementary file 2 [file 1]

**Supplemental Material S2.** English–Spanish Vocabulary Inventory (ESVI) regression results across studies.

**Table S2.1.** ESVI Regression results from Study 1.

| Dependent variable | Effect                      | Coefficient | SE    | <i>t</i> | <i>p</i> | 95% CI          |
|--------------------|-----------------------------|-------------|-------|----------|----------|-----------------|
| CCT Spanish        | Intercept                   | 11.487      | 4.282 | 2.683    | .010     | [2.852, 20.122] |
|                    | ESVI*<br>Expressive Spanish | 2.126       | 1.004 | 2.117    | .040     | [0.100, 4.151]  |
| CCT English        | Intercept                   | 10.887      | 2.726 | 3.993    | < .001   | [5.384, 16.388] |
|                    | ESVI*<br>Expressive English | 2.567       | 0.717 | 3.577    | < .001   | [1.118, 4.014]  |
| NTW                | Intercept                   | -4.88       | 0.500 | -0.977   | .334     | [-1.493, 0.516] |
|                    | ESVI*<br>Expressive TCV     | 0.757       | 0.111 | 6.820    | < .001   | [0.534, 0.981]  |
| NTW                | Intercept                   | -0.290      | 0.507 | -0.572   | .57      | [-1.308, 0.729] |
|                    | ESVI*<br>Expressive TV      | 0.684       | 0.108 | 6.327    | < .001   | [.467, 0.902]   |
| NDW                | Intercept                   | -0.589      | 0.417 | -1.406   | .166     | [-1.423, 0.251] |
|                    | ESVI*<br>Expressive TCV     | 0.646       | 0.093 | 6.981    | < .001   | [0.460, 0.833]  |
| NDW                | Intercept                   | -0.444      | 0.420 | -1.057   | .296     | [1.287, 0.400]  |
|                    | ESVI*<br>Expressive TV      | 0.590       | 0.090 | 6.489    | < .001   | [0.410, 0.770]  |
| Vocalizations      | Intercept                   | 1.587       | 0.381 | 4.168    | < .001   | [0.822, 2.353]  |
|                    | ESVI*<br>Expressive TCV     | 0.332       | 0.085 | 3.925    | < .001   | [0.162, 0.502]  |
| Vocalizations      | Intercept                   | 1.687       | 0.378 | 4.456    | < .001   | [0.923, 2.447]  |
|                    | ESVI*<br>Expressive TV      | 0.297       | 0.081 | 3.684    | < .001   | [0.135, 0.460]  |

*Note.* \* indicates variables where log transformations were computed to meet assumptions of normality for regressions.

**Table S2.2.** ESVI Regression results from Study 2.

| <b>Dependent variable</b> | <b>Effect</b>        | <b>Coefficient</b> | <b>SE</b> | <b><i>t</i></b> | <b><i>p</i></b> | <b>95% CI</b>    |
|---------------------------|----------------------|--------------------|-----------|-----------------|-----------------|------------------|
| LENA vocalizations        | Intercept            | 0.141              | 1.101     | 0.128           | .900            | [-2.311, 2.594]  |
|                           | ESVI* Expressive TV  | 0.663              | 0.287     | 2.305           | .044            | [0.022, 1.303]   |
| LENA vocalizations        | Intercept            | -2.070             | 4.881     | -4.24           | .680            | [-12.946, 8.805] |
|                           | ESVI* Receptive TV   | 0.851              | 0.919     | 0.926           | .376            | [-1.196, 2.898]  |
| LENA vocalizations        | Intercept            | 0.436              | 1.059     | 0.411           | .690            | [-1.924, 2.795]  |
|                           | ESVI* Expressive TCV | 0.603              | 0.284     | 2.123           | .060            | [-0.030, 1.237]  |
| LENA vocalizations        | Intercept            | -3.104             | 5.309     | -0.585          | .572            | [-14.933, 8.725] |
|                           | ESVI* Receptive TCV  | 1.080              | 1.032     | 1.046           | .320            | [-1.220, 3.381]  |

*Note.* \* indicates variables where log transformations were computed to meet assumptions of normality for regressions.

**Table S2.3.** ESVI Regression results from Study 3.

| <b>Dependent variable</b> | <b>Effect</b>        | <b>Coefficient</b> | <b>SE</b> | <b><i>t</i></b> | <b><i>p</i></b> | <b>95% CI</b>    |
|---------------------------|----------------------|--------------------|-----------|-----------------|-----------------|------------------|
| Expressive subtest PLS-5  | Intercept            | 2.931              | 0.104     | 28.30           | < .001          | [2.714, 3.147]   |
|                           | Age                  | -0.003             | 0.004     | -0.738          | .47             | [-0.0112, 0.006] |
|                           | ESVI* Expressive TCV | 0.081              | 0.014     | 5.925           | < .001          | [0.052, 0.110]   |
| Expressive subtest PLS-5  | Intercept            | 2.925              | 0.104     | 28.055          | < .001          | [2.707, 2.143]   |
|                           | Age                  | -0.003             | 0.004     | -0.657          | .519            | [-0.011, 0.006]  |
|                           | ESVI* Expressive TV  | 0.078              | 0.013     | 5.868           | < .001          | [0.050, 0.105]   |
| Receptive subtest PLS-5   | Intercept            | 2.508              | 0.189     | 13.294          | < .001          | [2.113, 2.903]   |
|                           | Age                  | 0.010              | 0.008     | 1.279           | .216            | [-0.006, 0.026]  |
|                           | ESVI* Expressive TCV | 0.124              | 0.025     | 4.965           | < .001          | [0.071, 0.176]   |
| Receptive subtest PLS-5   | Intercept            | 2.500              | 0.190     | 13.125          | < .001          | [2.101, 2.899]   |
|                           | Age                  | 0.010              | 0.008     | 1.345           | .195            | [-0.006, 0.026]  |
|                           | ESVI* Expressive TV  | 0.118              | 0.024     | 4.887           | < .001          | [0.068, 0.169]   |
| CDC Milestones Met        | Intercept            | -0.334             | 0.150     | -2.226          | .038            | [-0.649, -0.020] |
|                           | Age                  | -0.006             | 0.006     | -1.031          | .316            | [-0.018, 0.006]  |
|                           | ESVI* Expressive TCV | 0.080              | 0.020     | 4.016           | < .001          | [0.038, 0.117]   |
| CDC Milestones Met        | Intercept            | -0.340             | 0.149     | -2.285          | .034            | [-0.652, -0.029] |
|                           | Age                  | -0.006             | 0.006     | -1.010          | .325            | [-0.018, 0.006]  |
|                           | ESVI* Expressive TV  | 0.078              | 0.019     | 4.095           | < .001          | [0.038, 0.117]   |

*Note.* \* indicates variables where log transformations were computed to meet assumptions of normality for regressions.
